# Supplementary material
Source: PubMed Central journal article supplement (PMC6812602)

## **Supplementary Material**

### **Supplementary Methods**

*Description of the ASPREE trial*

*Laboratory measures*

*Formulae GFR Estimating Equations*

**Table S1.** CKD Status by the BIS1 Equation

**Table S2.** Comparison between APSREE, Berlin Initiative Study and Chronic Kidney Disease Epidemiology Collaboration (CKD-EPI) Derivation Cohorts.

**Figure S1.** Kernel density plots demonstrating the distribution of eGFR by CKD-EPI and BIS1 equations according to presence or absence of (panel A) diabetes and (panel B) hypertension.

BIS1, Berlin Initiative Study; CKD-EPI, Chronic Kidney Disease Epidemiology Collaboration; eGFR, estimated glomerular filtration rate.

### *Description of the ASPREE trial*

ASPREE is a large trial of 19,114 elderly participants, of whom 16,703 (all aged  $\geq 70$  years) are from Australia and the remainder (2,411) are from the USA. The latter group focuses on members of racial and ethnic minorities (age  $\geq 65$  years). Interested older people in Australia or the US who gave informed consent underwent two baseline visits to determine study eligibility, and to collect clinical, demographic, physical function, and baseline study data. Volunteers were excluded if they had a past history of cardiovascular events or established CVD, atrial fibrillation, dementia or a Modified Mini-Mental State Examination score of  $< 78$ , physical disability (defined by severe difficulty or inability to perform any of the six Katz Activities of Daily Living<sup>1</sup>), any major inter-current illness or chronic condition with a high current or recurrent risk of bleeding, anemia, any condition deemed likely to cause death within 5 years, current use of other antiplatelet or anticoagulant medication, or of aspirin for secondary stroke prevention, and uncontrolled high blood pressure (systolic blood pressure  $\geq 180$  mmHg and/or diastolic blood pressure  $\geq 105$  mmHg). Individuals with well-controlled diabetes mellitus were not specifically excluded, nor were those with a diagnosis of CKD. Individuals with stage 5 CKD requiring dialysis or those with a functioning kidney transplant were excluded.

### *Laboratory measures*

In Australia, fasting blood and spot urine samples were collected with referral by a local pathology service after the first baseline visit and prior to the second. In the US, fasting blood and urine collection and analyses were conducted by the participating research clinic. Determination of serum creatinine and urine albumin and creatinine concentration were performed in local laboratories using standardized clinical pathology methods. All Australian

participants (87% of the total sample) had serum creatinine values measured in IDMS-standardized fashion. It is uncertain what proportion of US participants had serum creatinine determined using an IDMS-standardized assay. As of 2008, half of all US labs were standardized and all major worldwide assay manufacturers were providing IDMS-standardized materials as of the end of 2009<sup>2</sup>. We think it likely that only a minority of US participants, if any, had non-IDMS-standardized Cr measurements given that in the US the study commenced recruitment in the second half of 2010. We therefore assumed that all creatinine measure were IDMS-standardized

### *Formulae GFR Estimating Equations*

#### **CKD-EPI<sup>3</sup>:**

White or Other:

$$\text{Female \& \leq Scr 62 } \mu\text{mol/L: } GFR = 144 * \left(\frac{Scr}{0.7}\right)^{-0.329} * (0.993)^{Age}$$

$$\text{Female \& > Scr 62 } \mu\text{mol/L: } GFR = 144 * \left(\frac{Scr}{0.7}\right)^{-1.209} * (0.993)^{Age}$$

$$\text{Male \& \leq Scr 80 } \mu\text{mol/L: } GFR = 141 * \left(\frac{Scr}{0.9}\right)^{-0.411} * (0.993)^{Age}$$

$$\text{Male \& > Scr 80 } \mu\text{mol/L: } GFR = 141 * \left(\frac{Scr}{0.9}\right)^{-1.209} * (0.993)^{Age}$$

Black:

$$\text{Female \& \leq Scr 62 } \mu\text{mol/L: } GFR = 166 * \left(\frac{Scr}{0.7}\right)^{-0.329} * (0.993)^{Age}$$

$$\text{Female \& > Scr 62 } \mu\text{mol/L: } GFR = 166 * \left(\frac{Scr}{0.7}\right)^{-1.209} * (0.993)^{Age}$$

$$\text{Male \& \leq Scr 80 } \mu\text{mol/L: } GFR = 163 * \left(\frac{Scr}{0.9}\right)^{-0.411} * (0.993)^{Age}$$

Male & >Scr 80  $\mu\text{mol/L}$ :  $GFR = 163 * \left(\frac{Scr}{0.9}\right)^{(-1.209)} * (0.993)^{Age}$

where serum creatinine is in mg/dL.

#### **BIS1<sup>4</sup>**

$$GFR = 3736 * Scr^{-0.95} * Age^{-0.95} * 0.82 \text{ (if female)}$$

where serum creatinine is in mg/dL.

The mean bias of the BIS1 equation versus measured GFR was 0.11 with a P<sub>30</sub> of 95.1%<sup>4</sup>.

#### **References:**

1. Katz S. Assessing self-maintenance: activities of daily living, mobility, and instrumental activities of daily living. *J Am Geriatr Soc.* 1983;31(12):721-727.
2. Chronic Kidney Disease (CKD) Surveillance System, CDC, USA.  
<https://nccd.cdc.gov/ckd/detail.aspx?QNum=Q223>. Accessed 27/11/2018.
3. Levey AS, Stevens LA, Schmid CH, et al. A new equation to estimate glomerular filtration rate. *Ann Intern Med.* 2009;150(9):604-612.
4. Schaeffner ES, Ebert N, Delanaye P, et al. Two novel equations to estimate kidney function in persons aged 70 years or older. *Ann Intern Med.* 2012;157(7):471-481.

**Table S1.** CKD Status by BIS1 Equation

|                                                | CKD Status (BIS1 Equation)      |                             |                            | P       |
|------------------------------------------------|---------------------------------|-----------------------------|----------------------------|---------|
|                                                | No CKD<br><i>n</i> = 9509 (54%) | CKD<br><i>n</i> = 8253(46%) | Total<br><i>n</i> = 17,762 |         |
| Age at randomization, years, mean (SD)         | 73.8 (3.6)                      | 76.6 (5.0)                  | 75.1(4.6)                  | < 0.001 |
| Age group, years, <i>n</i> (%)                 |                                 |                             |                            | < 0.001 |
| 65-69                                          | 367 (4)                         | 181 (2)                     | 548 (3)                    |         |
| 70-74                                          | 6324 (67)                       | 3476 (42)                   | 9800 (55)                  |         |
| 75-79                                          | 2160 (23)                       | 2528 (31)                   | 4688 (26)                  |         |
| 80-84                                          | 560 (6)                         | 1490 (18)                   | 2050 (12)                  |         |
| ≥ 85                                           | 98 (1)                          | 578 (7)                     | 676 (4)                    |         |
| Country, <i>n</i> (%)                          |                                 |                             |                            | 0.22    |
| Australia                                      | 8347 (88)                       | 7079 (86)                   | 15426 (87)                 |         |
| US                                             | 1162 (12)                       | 1174 (14)                   | 2336 (13)                  |         |
| Female, <i>n</i> (%)                           | 5392 (57)                       | 4633 (56)                   | 10025 (56)                 | < 0.001 |
| Living Situation, <i>n</i> (%)                 |                                 |                             |                            | < 0.001 |
| Home alone                                     | 2897 (30)                       | 2915 (35)                   | 5812 (33)                  |         |
| Home with family, friends, spouse              | 6580 (69)                       | 5290 (64)                   | 11870 (67)                 |         |
| Residential home                               | 32 (0)                          | 48 (1)                      | 80 (0)                     |         |
| Years of Education, <i>n</i> (%)               |                                 |                             |                            | < 0.001 |
| < 9                                            | 1398 (15)                       | 1395 (17)                   | 2793 (16)                  |         |
| 9-11                                           | 2771 (29)                       | 2418 (29)                   | 5189 (29)                  |         |
| 12                                             | 1136 (12)                       | 1016 (12)                   | 2152 (12)                  |         |
| 13-15                                          | 1603 (17)                       | 1442 (17)                   | 3045 (17)                  |         |
| 16                                             | 904 (10)                        | 736 (9)                     | 1640 (9)                   |         |
| 17-21                                          | 1697 (18)                       | 1246 (15)                   | 2943 (17)                  |         |
| Family history of kidney disease, <i>n</i> (%) | 645 (7)                         | 599 (7)                     | 1244 (7)                   | 0.063   |
| Diabetes mellitus, <i>n</i> (%)                | 881 (9)                         | 1046 (13)                   | 1927 (11)                  | < 0.001 |
| Hypertension, <i>n</i> (%)                     | 6601 (69)                       | 6597 (80)                   | 13198 (74)                 | < 0.001 |
| Smoking, <i>n</i> (%)                          |                                 |                             |                            | 0.59    |
| Current                                        | 394 (4)                         | 298 (4)                     | 692 (4)                    |         |
| Former                                         | 3900 (41)                       | 3378 (41)                   | 7278 (41)                  |         |
| Never                                          | 5215 (55)                       | 4577 (55)                   | 9792 (55)                  |         |
| Alcohol Use, <i>n</i> (%)                      |                                 |                             |                            | <0.001  |
| Current                                        | 7496 (79)                       | 6104 (74%)                  | 13600 (77)                 |         |
| Former                                         | 549 (6)                         | 521 (6%)                    | 1070 (6)                   |         |
| Never                                          | 1464 (15)                       | 1628 (20%)                  | 3092 (17)                  |         |
| Systolic BP, mean (SD)                         | 138.2 (16.2)                    | 140.3(16.8)                 | 139.2 (16.5)               | < 0.001 |
| Diastolic BP, mean (SD)                        | 77.5 (9.8)                      | 77.1(10.2)                  | 77.3 (10.0)                | 0.68    |
| ACE/ARB                                        | 4305 (42)                       | 3948 (53)                   | 8253 (47)                  | <0.001  |
| Total cholesterol, mg/DL, mean (SD)            | 204.2 (37.5)                    | 200.8(38.6)                 | 202.7 (38.1)               | < 0.001 |
| Triglyceride, mg/DL, mean (SD)                 | 113.1 (56.8)                    | 122.4(60.2)                 | 117.4 (58.6)               | < 0.001 |
| Height, m, mean (SD)                           | 1.66 (0.09)                     | 1.65(0.09)                  | 1.65 (0.09)                | 0.72    |
| Weight, kg, mean (SD)                          | 76.6 (14.9)                     | 77.4(15.1)                  | 77.0 (15.0)                | < 0.001 |
| Body mass index, kg/m <sup>2</sup> , mean (SD) | 27.9 (4.7)                      | 28.3(4.8)                   | 28.1(4.7)                  | < 0.001 |
| eGFR (BIS1), mL/min/m <sup>2</sup> mean (SD)   | 70.0 (7.9)                      | 54.4 (8.8)                  | 62.7 (11.4)                | < 0.001 |
| UACR, mg/mmol, median (IQR)                    | 0.7 (0.4-1.1)                   | 1.0 (0.5-2.9)               | 0.8 (0.5-1.5)              | < 0.001 |
| Physical component t-score, mean (SD)          | 49.0 (8.5)                      | 47.6(9.0)                   | 48.4 (8.7)                 | < 0.001 |

---

|                                     |            |            |            |      |
|-------------------------------------|------------|------------|------------|------|
| Mental component t-score, mean (SD) | 55.6 (7.1) | 55.8 (7.1) | 55.7 (7.1) | 0.60 |
|-------------------------------------|------------|------------|------------|------|

---

BIS, Berlin Initiative Study; BP, blood pressure; CKD, chronic kidney disease; eGFR, estimated glomerular filtration rate; IQR, interquartile range; SD, standard deviation; UACR, urine albumin to creatinine ratio; ACE/ARB, angiotensin converting enzyme inhibitor, angiotensin receptor blocker or aldosterone antagonist use.

**Table S2.** Comparison between APSREE, Berlin Initiative Study and Chronic Kidney Disease Epidemiology Collaboration (CKD-EPI) Derivation Cohorts.

|                                           | Cohort                |                            |                 |
|-------------------------------------------|-----------------------|----------------------------|-----------------|
|                                           | CKD-EPI<br>Derivation | Berlin Initiative<br>Study | ASPREE<br>Study |
| Number of Subjects                        | 5,504                 | 570                        | 17,762          |
| Mean Age, years                           | 47.0                  | 78.5                       |                 |
| Age $\geq$ 70 years, %                    | ~3*                   | 100                        | 97              |
| Female, %                                 | 43                    | 43                         | 56              |
| Diabetes mellitus, %                      | 29                    | 24                         | 11              |
| Hypertension, %                           | -                     | 76                         | 74              |
| Myocardial infarction, %                  | -                     | 15                         | 0               |
| Current or Former Smoker, %               | -                     | 52                         | 45              |
| Weight, kg, mean                          | 82                    | 77                         | 77              |
| Body mass index, kg/m <sup>2</sup> , mean | 28                    | 28**                       | 28              |

- Not available.

\* Refers to percent  $>$ 70 years.

\*\* Not directly provided in paper, calculated from mean height and weight for cohort.

**Figure S1A.**

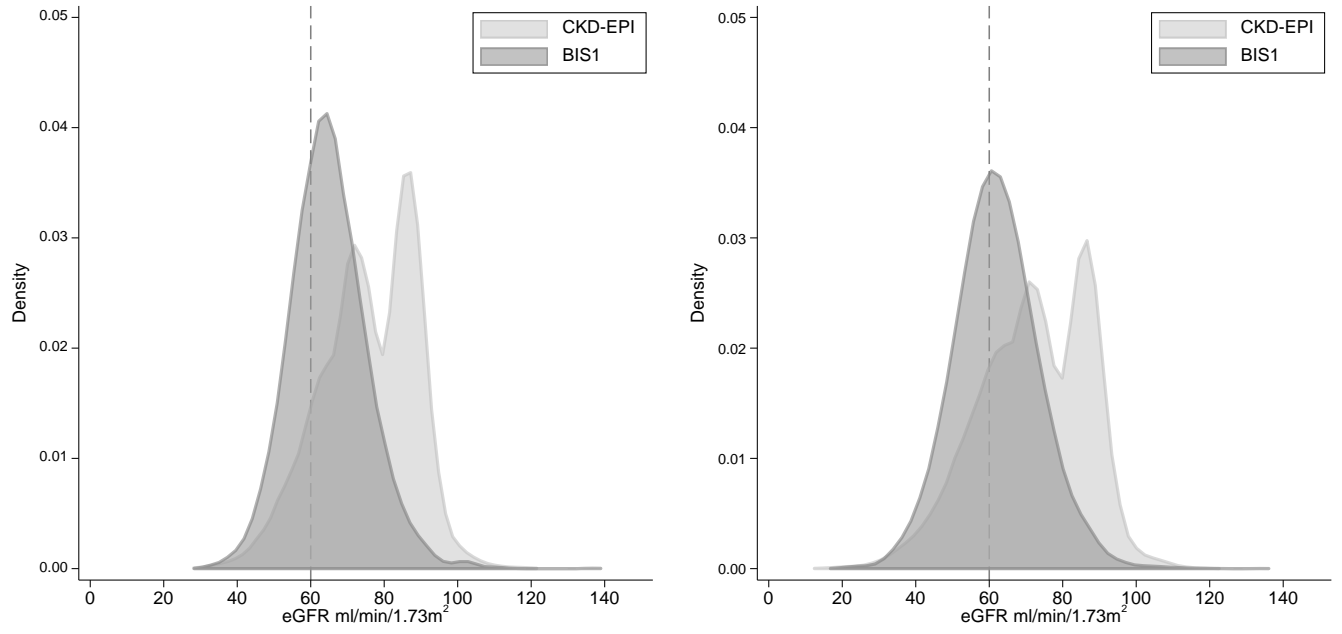



**Figure S1B.**

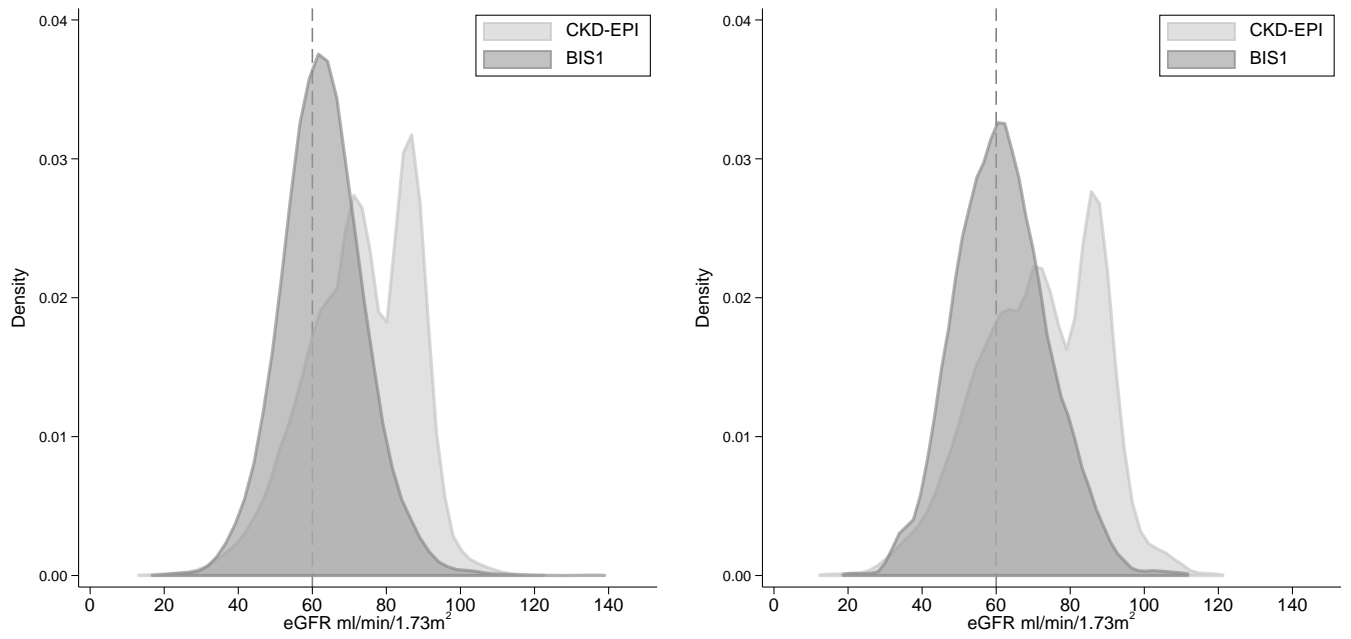

Supplement: NIHMS1048063-supplement-Supplemental.pdf [file NIHMS1048063-supplement-Supplemental.pdf]
